# Supplementary material for: Simultaneous reduction and nitrogen doping of graphite oxide by using electron beam irradiation
Source: Royal Society of Chemistry journal article supplement (doi:10.1039/c5ra20199c), 2015-01-01
Supplement: c5ra20199c1.pdf [file c5ra20199c1.pdf]

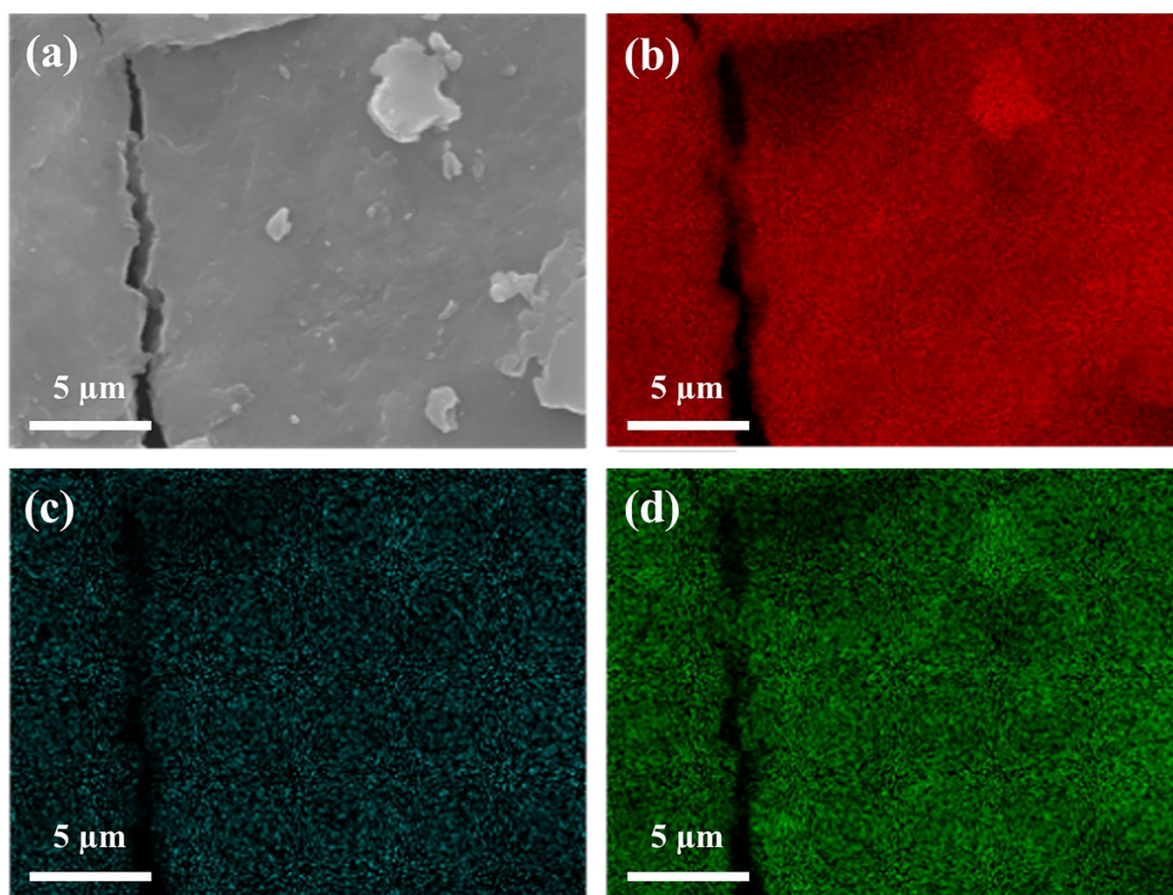

Fig. S1 (a) The FE-SEM images of the N-doped graphene (NG-300) and corresponding EDS maps, (b) C, (c) N, and (d) O.

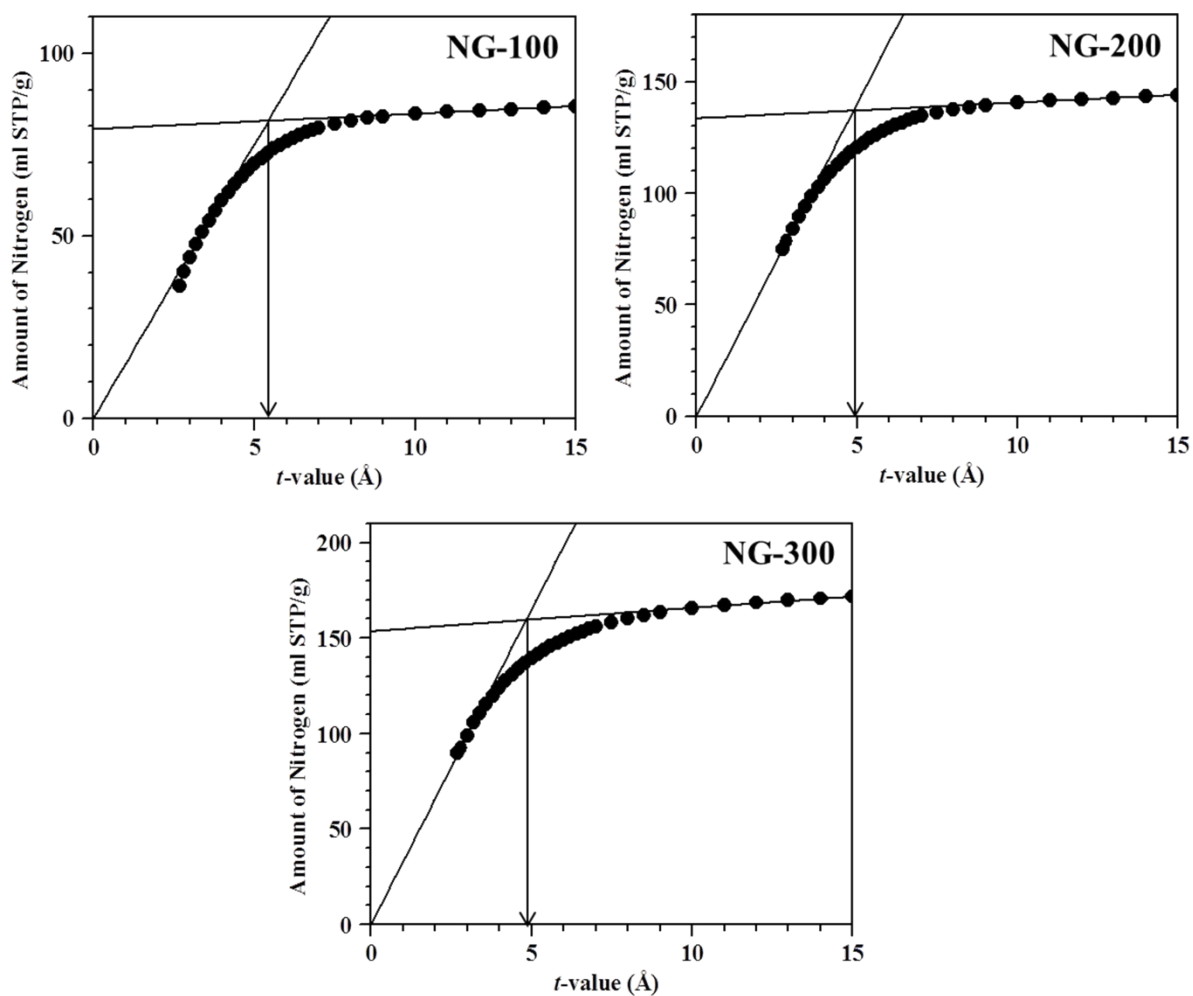

Fig. S2  $t$ -plots calculated from  $N_2$  adsorption-desorption isotherms for NGs.

Table S1 CHNS elemental analysis data of the obtained NGs.

| <i>Sample<sup>a</sup></i> | <i>C (wt%)</i> | <i>H (wt%)</i> | <i>N (wt%)</i> | <i>O (wt%)<sup>b</sup></i> | <i>C/O ratio<sup>c</sup></i> |
|---------------------------|----------------|----------------|----------------|----------------------------|------------------------------|
| GO                        | 47.66          | 1.96           | -              | 50.38                      | 1.26                         |
| NG-100                    | 75.11          | 1.75           | 3.54           | 19.60                      | 5.12                         |
| NG-200                    | 77.30          | 1.74           | 3.39           | 17.57                      | 5.87                         |
| NG-300                    | 76.72          | 1.96           | 3.2            | 18.12                      | 5.65                         |

<sup>a</sup>All samples were dried in a vacuum oven at 80 °C for 24 h before elemental measurements.

<sup>b</sup>The values of O were calculated by subtracting the sum of C and H from 100%.

<sup>c</sup>The C/O ratio were calculated according to following equation:  $C/O = 16C\%(wt)/12O\%(wt)$ .

Table S2 The N configuration portions of NGs in total nitrogen atom.

| <i>Sample</i> | <i>N-6<sup>a</sup> (%)<sup>b</sup></i> | <i>N-5<sup>a</sup> (%)<sup>b</sup></i> | <i>N-G<sup>a</sup> (%)<sup>b</sup></i> | <i>N-X<sup>a</sup> (%)<sup>b</sup></i> |
|---------------|----------------------------------------|----------------------------------------|----------------------------------------|----------------------------------------|
| NG-100        | 29.4                                   | 63.1                                   | 7.5                                    | -                                      |
| NG-200        | 26.2                                   | 62.0                                   | 8.3                                    | 3.5                                    |
| NG-300        | 30.0                                   | 64.4                                   | 5.6                                    | -                                      |

<sup>a</sup>N-6, N-5, N-G, and N-X denote pyridinic-N, pyrrolic-N, graphitic-N and pyridinic-N-oxide, respectively.

<sup>b</sup>The values of the N configuration portions were calculated by the deconvoluted area of the N 1s XPS spectra (N-6 + N-5 + N-G + N-X = 100%).

Table S3 Electro conductivity of GO, and NGs.

| <i>Sample</i> | <i>Electro conductivity (S/m)</i> |
|---------------|-----------------------------------|
| GO            | $<2 \times 10^{-7}$               |
| NG-100        | $2.8 \times 10$                   |
| NG-200        | $1.4 \times 10^2$                 |
| NG-300        | $8.3 \times 10$                   |

The thickness and the sheet resistance of prepared tablets of NGs use to calculate the electrical conductivity of the NGs by following equation:

$$\sigma = 1 / (R \times t)$$

where  $\sigma$  is electrical conductivity in S/m, R is sheet resistance in ohm/sq, t is thickness in m. All prepared tablet of NGs has the thickness of 0.6 mm.
